# Supplementary material
Source: PubMed Central journal article supplement (PMC2689802)
Supplement: en.2008-1181_1.pdf [file en.2008-1181_1.pdf]

| Construct Name                     | Sense Primer Name – Sequence (5' to 3')                                                     | Antisense Primer Name – Sequence (5' to 3')                                                   | Restriction Endonuclease |
|------------------------------------|---------------------------------------------------------------------------------------------|-----------------------------------------------------------------------------------------------|--------------------------|
| pCMV-ARP502L                       | N166 – TAGCCCCCTACGGCTACTACT<br>2. PCR product from above                                   | J12-502AS – CATGCCGCCAAGGTACCACAC<br>HindIIIAS – GACACCCAGAAGCTTCATCTCCA                      | <i>Bsu36I/HindIII</i>    |
| pCMV-ARS513G                       | N166– TAGCCCCCTACGGCTACTACT<br>PCR product from above                                       | J12-513-AS – ACAAGTGGGACCGGGATAGGG<br>X4AS – ACACACTACACCTGGCTC                               | <i>Bsu36I/HindIII</i>    |
| pCMV-ARD526G                       | p367-Ex1 - CCCTGGATGGGTAGCTACTCCG<br>N166 – TAGCCCCCTACGGCTACTACT                           | HindIIIAS – GACACCCAGAAGCTTCATCTCCA<br>PCR product from above                                 | <i>Bsu36I/HindIII</i>    |
| pCMV-ARM535A                       | N166– TAGCCCCCTACGGCTACTACT<br>PCR product from above                                       | J7-535-AS – CTCCAAACGCCTGTCCCGTA<br>X4AS – ACACACTACACCTGGCTC                                 | <i>Bsu36I/HindIII</i>    |
| pCMV-ARM535V                       | N166– TAGCCCCCTACGGCTACTACT<br>PCR product from above                                       | J6-535-AS – CTCCAAACGCACGTCCCGTA<br>X4AS – ACACACTACACCTGGCTC                                 | <i>Bsu36I/HindIII</i>    |
| pCMV-ARΔ35αα                       | N111 CAGAATCTGTTCCAGAGCGTGC<br><br>D35aaS –<br>CACCGCACCTGATGTGCGTTTGGAGACTGCCAG<br>GGACGTC | D35aaAS –<br>CACAGATCAGGCAGGTGCGACTCTGGTACGCAGCTG<br>X4AS – ACACACTACACCTGGCTC                |                          |
|                                    | N111 – CAGAATCTGTTCCAGAGCGTGC                                                               | X4AS- ACACACTACACCTGGCTC                                                                      | <i>BstEII/TthIII1</i>    |
| pVP16-AR(1-538)Δ35αα               | N111- CAGAATCTGTTCCAGAGCGTGC<br><br>pVd35S –<br>TTCACCGCACCTGATGTGCGTTTGGAGTAGTCT<br>AGAAT  | pVd35AS –<br>ATTCTAGACTACTCCAAACGCACATCAGGTGCGGTGA<br>A<br>pVP16AS1 – ACCTCTACAAATGTGGTATGGCT |                          |
|                                    | N111 – CAGAATCTGTTCCAGAGCGTGC                                                               | pVP16AS1 – ACCTCTACAAATGTGGTATGGCT                                                            | <i>Bsu36I/XbaI</i>       |
| pVP16-AR(1-538)M535A               | N111- CAGAATCTGTTCCAGAGCGTGC                                                                | pVM535A –<br>ATTCTAGACTACTCCAAACGCAGTCCCGTA                                                   | <i>Bsu36I/XbaI</i>       |
| pVP16-AR(1-538)M535V               | N111- CAGAATCTGTTCCAGAGCGTGC                                                                | pVM535V –<br>ATTCTAGACTACTCCAAACGCACGTCCCGTA                                                  | <i>Bsu36I/XbaI</i>       |
| pVP16-AR(1-538)P502L, S513G, D526G | N166 – TAGCCCCCTACGGCTACTACT                                                                | ptmutAS1 - TTATCTAGATTACTCAA<br>ACGCATGTCCCGTA                                                | <i>Bsu36I/XbaI</i>       |
| pVP16-AIB1                         | AIB1-VF1 -<br>AATGTCGACGCAGTGGATTAGGAGAAACTTG<br>GATC                                       | AIB1-VR1 -<br>ATAAAGCTTTGGTGTTCATCAACATACGGCA                                                 | <i>Sall/HindIII</i>      |
| pVP16-SRC1a                        | SRC1-VF1 -<br>AATGTCGACGCAGTGGCCTTGGGGACAGTTCAT<br>C                                        | SRC1-VR1 - TGGCAAGCTTCTTGTTCTCGGT                                                             | <i>Sall/HindIII</i>      |

|                       |                                                    |                                               |                    |
|-----------------------|----------------------------------------------------|-----------------------------------------------|--------------------|
| pcDNA3.1-ARNTD        | AR-NTD-S<br>ATGCGCGGCCGCTATGGAAGTCCAGTTAGGGCT<br>G | AR-NTD-AS<br>ATGCTCTAGAAAAGTAATAGTCAATGGGCAA  | <i>NotI/XbaI</i>   |
| pcDNA3.1-ARNTD(1-535) | 120727S -<br>GCACTGGACGAGGCAGCTGCGTACCAG           | pcMODT535 -<br>TCCTCTAGACATGTCCCCGTAAGGTCCGGA | <i>BstEII/XbaI</i> |
| pcDNA4.1-ARNTD(1-500) | 120727S -<br>GCACTGGACGAGGCAGCTGCGTACCAG           | pcMODT500 -<br>TCCTCTAGACCACACATCAGGTGCGGTGA  | <i>BstEII/XbaI</i> |

Supplementary table 1
