# Supplementary material
Source: PubMed Central journal article supplement (PMC2689802)
Supplement: en.2008-1181_2.pdf [file en.2008-1181_2.pdf]

| Common name   | Scientific name                 | Gene name    | Accession Number |
|---------------|---------------------------------|--------------|------------------|
| Baboon        | <i>Papio hamadryas</i>          |              | AAC73047         |
| Chichlid      | <i>Astatotilapia burtoni</i>    |              | AAD25074         |
| Chicken       | <i>Gallus gallus</i>            |              | NP_001035179     |
| Chimpanzee    | <i>Pan troglodytes</i>          |              | AAC73048         |
| Clawed frog   | <i>Xenopus laevis</i>           |              | NP_001084353     |
| Dog           | <i>Canis lupus familiaris</i>   |              | NP_001003053     |
| Dogfish       | <i>Squalus acanthias</i>        |              | AAP55843         |
| Horse         | <i>Equus caballus</i>           |              | XP_001504915     |
| Human         | <i>Homo sapiens</i>             |              | NP_001011645     |
| Japanese eel  | <i>Oryzias latipes</i>          | AR $\alpha$  | NP_001098151     |
|               | <i>Oryzias latipes</i>          | AR $\beta$   | ABF50763         |
| Macaque       | <i>Macaca fascicularis</i>      |              | AAC73050         |
| Macaque       | <i>Macaque mulatta</i>          |              | NP_001028083     |
| Minnnow       | <i>Pimephales promelas</i>      |              | AAF88138         |
| Mouse         | <i>Mus musculus</i>             |              | AAA37234         |
| Nile tilapia  | <i>Oreochromis niloticus</i>    | AR $\alpha$  | BAB20081         |
|               | <i>Oreochromis niloticus</i>    | AR $\beta$   | BAB20082         |
| Pig           | <i>Sus scrofa</i>               |              | NP_999479        |
| Rabbit        | <i>Oryctolagus cuniculus</i>    |              | AAC48469         |
| Rat           | <i>Rattus norvegicus</i>        |              | NP_036634        |
| Red sea bream | <i>Pagrus major</i>             |              | BAA33451         |
| Stickleback   | <i>Gasterosteus aculeatus</i>   | AR $\beta$ 1 | AAO83573         |
|               | <i>Gasterosteus aculeatus</i>   | AR $\beta$ 2 | AAO83572         |
| Trout         | <i>Oncorhynchus mykiss</i>      | AR $\alpha$  | BAA32784         |
|               | <i>Oncorhynchus mykiss</i>      | AR $\beta$   | BAA32785         |
| Wrasse fish   | <i>Halichoeres trimaculatus</i> |              | AAG48340         |
| Zebrafinch    | <i>Taeniopygia guttata</i>      |              | NP_001070156     |
| Zebrafish     | <i>Danio rerio</i>              |              | XP_686520        |

**Supplementary table 2**
